# Supplementary material
Source: Springer Nature journal article supplement (https://www.springermedizin.de/resource/supplementary/13256_2011_1987_MOESM1_ESM.pdf/9648768)

**I**

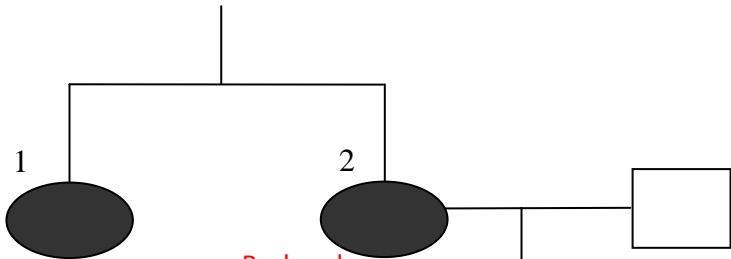

Proband

**II**

Supplement: MOESM1 [file 9648768]
